# Supplementary material for: Brief communication – Vent opening at Campi Flegrei: clues from dyke propagation patterns
Source: Copernicus journal article supplement (doi:10.5194/egusphere-2025-3615), 2025-08-18
Supplement: Supplementary file 2 [file egusphere-2025-3615-supplement.zip]

# **Supplementary figures of “Brief communication - Vent opening at Campi Flegrei: clues from dyke propagation patterns”**

Jacopo Selva<sup>1</sup>, Nello Mangone<sup>1</sup>

<sup>1</sup> Dipartimento di Scienze della Terra, dell’Ambiente e delle Risorse (DiSTAR), University of Naples Federico II, Naples Italy

*Correspondence to:* Jacopo Selva (jacopo.selva@unina.it)

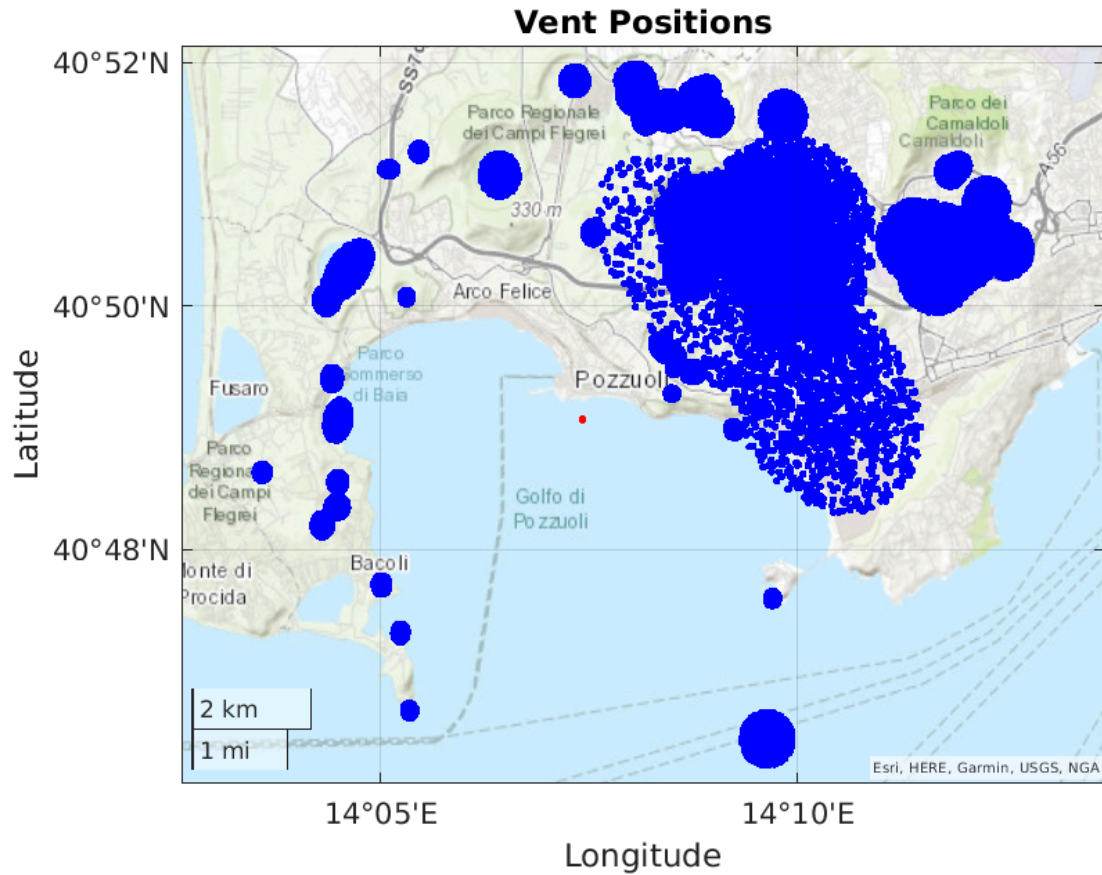

**Supplementary Figure 1: Set of 1000 resampled vent locations of past Campi Flegrei eruptions, accounting for the uncertainty on vent location**

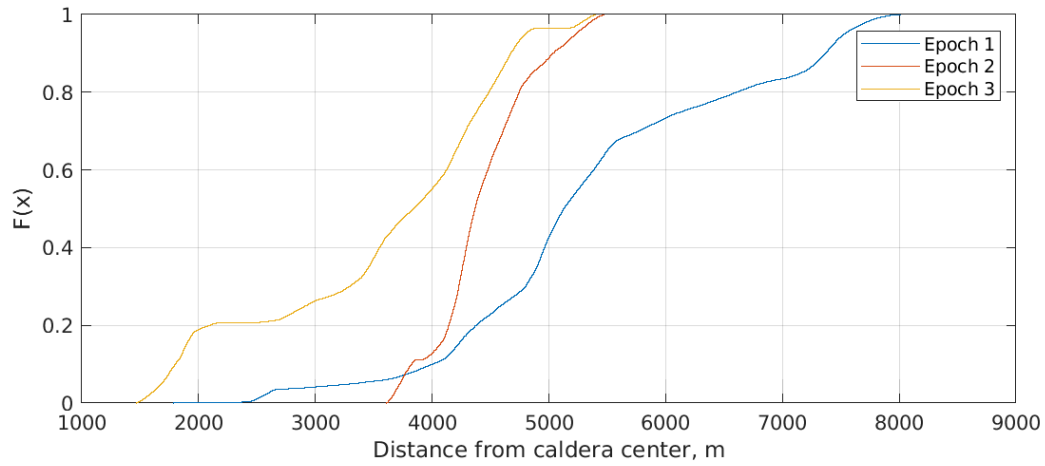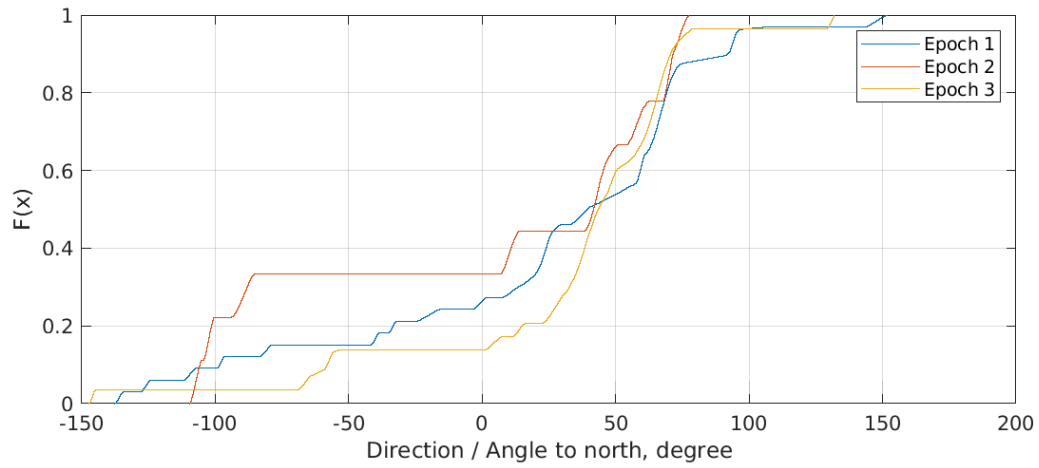

**Supplementary Figure 2 - Empirical cumulative distribution functions of (above) the dykes' radii (distance from the center of the caldera) and (below) directions (angle to north) for the 3 epochs of activity .**

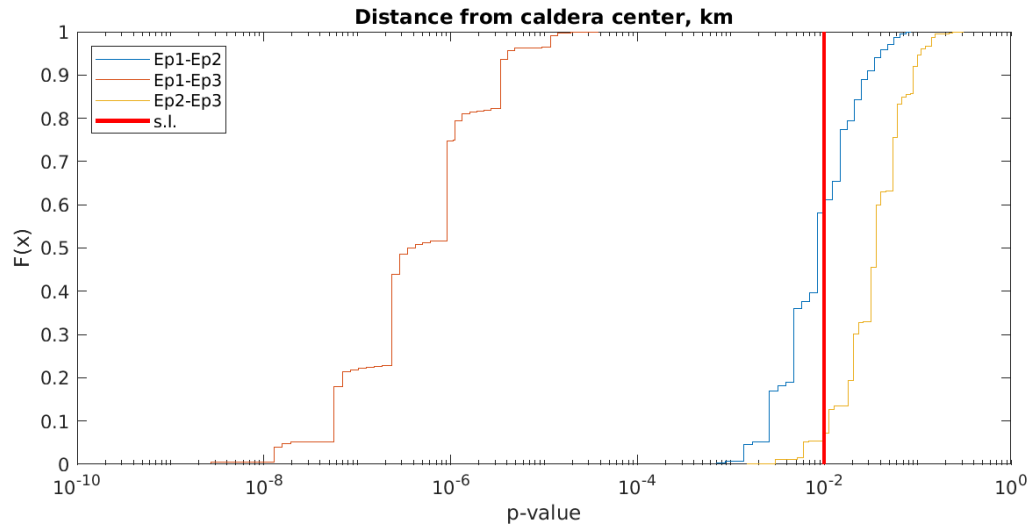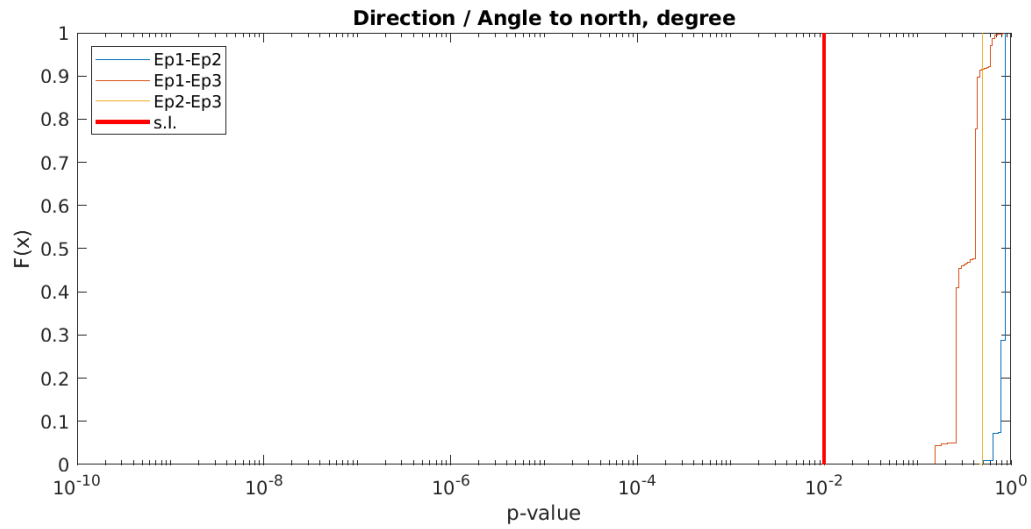

**Supplementary Figure 3 - Distribution of p-values for the KS2 test comparing radial distance (above) and propagation direction (below) in the 3 epochs of activity, considering 1000 resampled vent locations of past Campi Flegrei eruptions to account for the uncertainty on vent position. The significance level (red line) is set to 0.01.**

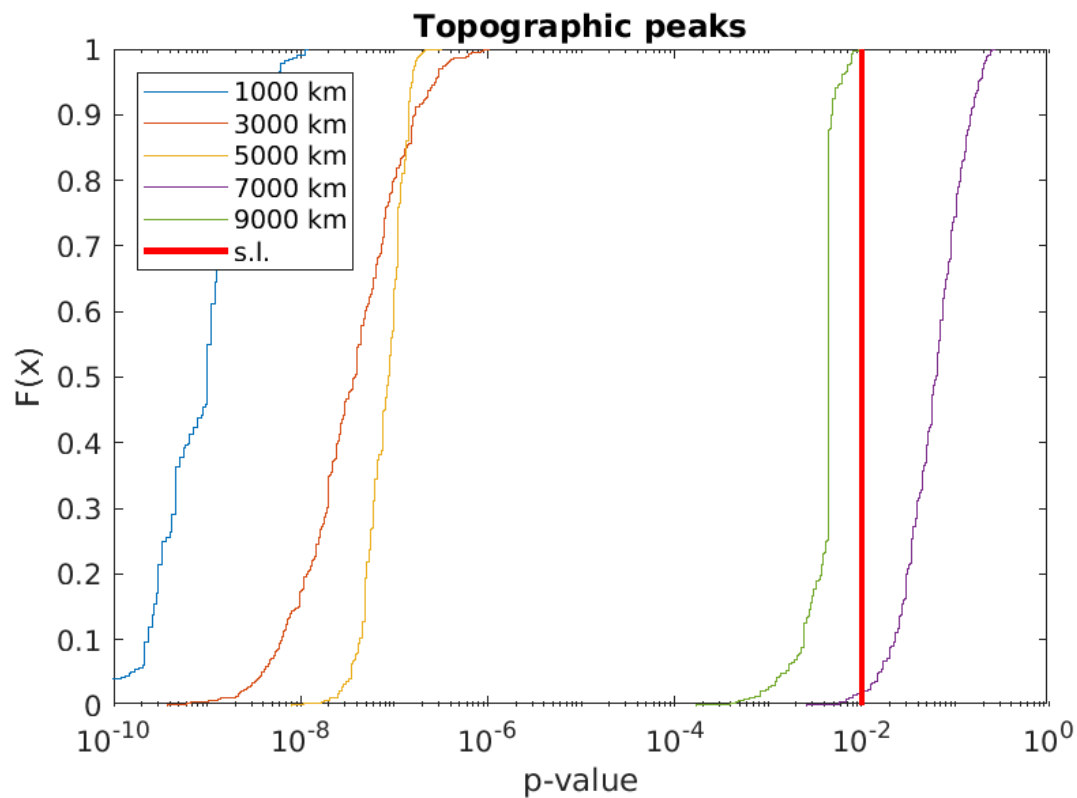

**Supplementary Figure 4 - Distribution of p-values for the 1-sample Kolmogorov-Smirnov test comparing the angular distribution of eruptions and topographic peaks within different radia from the caldera center. The distribution is obtained considering 1000 resampled vent locations of past Campi Flegrei eruptions to account for the uncertainty on vent position. The significance level (red line) is set to 0.01.**
